# Supplementary material
Source: publisher figshare collection journal article supplement (https://frontiersin.figshare.com/ndownloader/files/14131418)
Supplement: Supplementary file 1 [file 14131418]

| **Weighting factors for each area of micro-vulnerability** | |
| --- | --- |
| Trees | 1 |
| Parked cars on sidelwalks | 1 |
| Generic barriers | 1 |
| Garbage piles | 1 |
| Garbage bins | 1 |
| Telephone boxes | 1 |
| Fences | 1 |
| Parking lots | 1 |
| Fire taps | 1 |
| Kiosks | 1 |
| Signboards | 1 |
| Street vendors | 1 |
| Assorted objects | 1 |
| Poles | 1 |
| Restaurant areas | 1 |
| Grades | 0.4499 |
| Stairs | 0.4499 |
| Ramps | 0.4499 |
| Drainages | 0.4499 |
| Green areas | 0.091 |
| Chamber covers | 0.091 |
| Broken sidewalks | 0.091 |
